# Supplementary material for: High-sensitivity detection of low-concentration heavy metal ions in solution by multiple reflection enhanced absorption (MREA) spectroscopy
Source: Royal Society of Chemistry journal article supplement (doi:10.1039/d3ay02117c), 2024-01-01
Supplement: d3ay02117c1.pdf [file d3ay02117c1.pdf]

## Supplementary Information

### High-sensitivity detection of low-concentration heavy metal ions in solution by multiple reflection enhanced absorption (MREA) spectroscopy

Rong zhang,<sup>a</sup> Hongfei Liu,<sup>b</sup> Linhua Jiang,<sup>\*a, c</sup> Ning Duan,<sup>\*c</sup> Fuyuan Xu,<sup>c</sup> Wenjie Gao,<sup>d</sup> Yong Liu,<sup>e</sup>  
Guangbin Zhu,<sup>d</sup> and Jiaxin Wang<sup>b</sup>

<sup>a</sup>Water Science Research Institute, Beijing Normal University, Beijing 100875, China

<sup>b</sup>School of Physical Science and Engineering, Tongji University, Shanghai 200092, China

<sup>c</sup>School of Environmental Science and Engineering, Tongji University, Shanghai 200092, China.

<sup>d</sup>School of Environmental Science and Engineering, Tianjin University, Tianjin 300072, China

<sup>e</sup>School of Materials Science and Engineering, Anhui University of Science and Technology, Huainan 232001,  
China

\*Corresponding Author: Email: [ningduan2020@163.com](mailto:ningduan2020@163.com); [jianglinhua2022@163.com](mailto:jianglinhua2022@163.com)

#### Table of Contents

|                                                                                                                                                                      |   |
|----------------------------------------------------------------------------------------------------------------------------------------------------------------------|---|
| Fig. S1 Irradiance of different reflective surfaces during multiple reflections under the same incident light spot condition. ....                                   | 2 |
| Fig. S2 Repeatability of absorbance measurement at different wavelengths under different light spot conditions ( $A_R$ ): (A) Traditional absorption; (B) MREA. .... | 3 |
| Table S1 Relative spectral bandwidth ( $RBW$ ) of different substances under different spectral bandwidth conditions. ....                                           | 4 |
| Table S2 The relationship between relative spectral bandwidth ( $RBW$ ) and absorbance measurement error ( $A_E$ ). ....                                             | 5 |

**Fig. S1 Irradiance of different reflective surfaces during multiple reflections under the same incident light spot condition.**

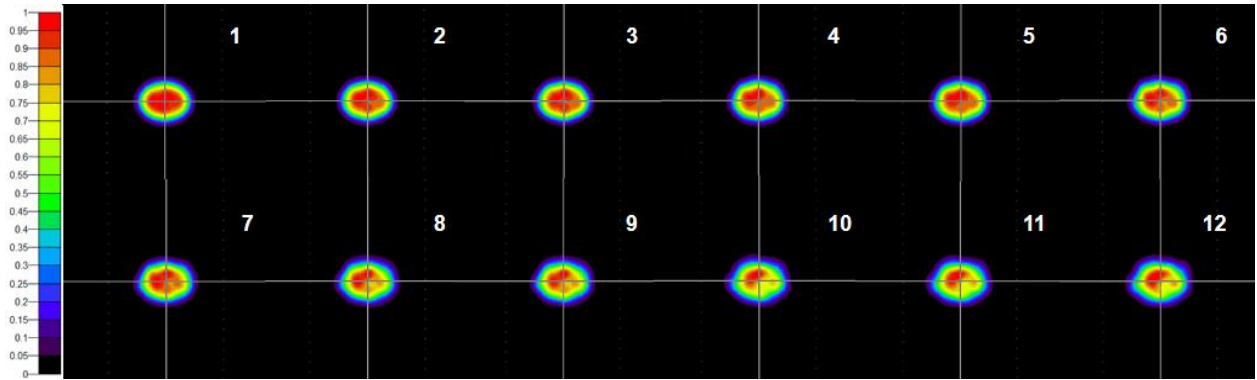

Fig. S2 Repeatability of absorbance measurement at different wavelengths under different

light spot conditions ( $A_R$ ): (A) Traditional absorption; (B) MREA.

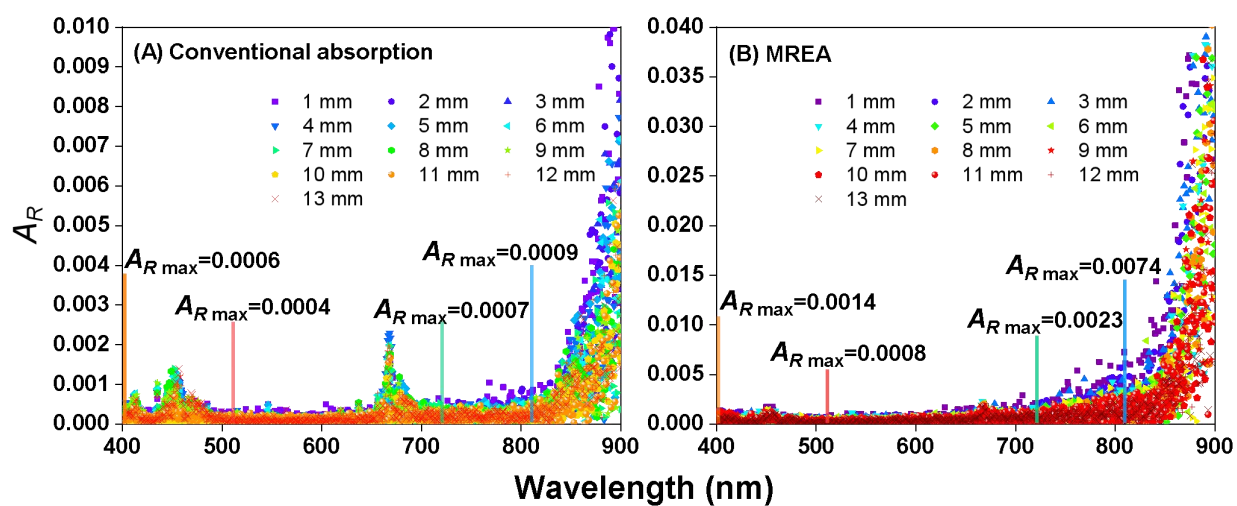

**Table S1 Relative spectral bandwidth (RBW) of different substances under different spectralbandwidth conditions.**

| Chemicals        | 0.4 nm  | 0.5 nm  | 0.6 nm  | 0.7 nm  | 0.8 nm  | 0.9 nm  | 1.0 nm  |
|------------------|---------|---------|---------|---------|---------|---------|---------|
| Cr <sup>6+</sup> | 0.00318 | 0.00420 | 0.00502 | 0.00597 | 0.00689 | 0.00744 | 0.00813 |
| Co <sup>2+</sup> | 0.00373 | 0.00447 | 0.00537 | 0.00633 | 0.00747 | 0.00833 | 0.00892 |
| Ni <sup>2+</sup> | 0.00228 | 0.00298 | 0.00335 | 0.00387 | 0.00456 | 0.0520  | 0.00598 |
| Cu <sup>2+</sup> | 0.00170 | 0.00201 | 0.00252 | 0.00289 | 0.00340 | 0.00405 | 0.00457 |

| Chemicals        | 1.1 nm  | 1.2 nm  | 1.3 nm  | 1.4 nm  | 1.5 nm  | 1.6 nm  | 1.7 nm  |
|------------------|---------|---------|---------|---------|---------|---------|---------|
| Cr <sup>6+</sup> | 0.00875 | 0.00954 | 0.01032 | 0.01124 | 0.01290 | 0.01367 | 0.01402 |
| Co <sup>2+</sup> | 0.00941 | 0.01120 | 0.01176 | 0.01294 | 0.01365 | 0.01494 | 0.01560 |
| Ni <sup>2+</sup> | 0.00628 | 0.00683 | 0.00739 | 0.00804 | 0.00857 | 0.00911 | 0.00989 |
| Cu <sup>2+</sup> | 0.00482 | 0.00510 | 0.00534 | 0.00572 | 0.00639 | 0.00680 | 0.00724 |

| Chemicals        | 1.8 nm  | 1.9 nm  | 2.0 nm  | 2.1 nm  | 2.2 nm  | 2.3 nm  | 2.4 nm  |
|------------------|---------|---------|---------|---------|---------|---------|---------|
| Cr <sup>6+</sup> | 0.01489 | 0.01521 | 0.01590 | 0.01667 | 0.01740 | 0.01801 | 0.01908 |
| Co <sup>2+</sup> | 0.01672 | 0.01781 | 0.01867 | 0.01994 | 0.02067 | 0.02138 | 0.02241 |
| Ni <sup>2+</sup> | 0.01024 | 0.01082 | 0.01139 | 0.01187 | 0.01271 | 0.01309 | 0.01367 |
| Cu <sup>2+</sup> | 0.00771 | 0.00800 | 0.00850 | 0.00892 | 0.00943 | 0.00978 | 0.01020 |

| Chemicals        | 2.5 nm  | 2.6 nm  | 2.7 nm  | 2.8 nm  | 2.9 nm  | 3.0 nm  |
|------------------|---------|---------|---------|---------|---------|---------|
| Cr <sup>6+</sup> | 0.02105 | 0.02227 | 0.02405 | 0.02567 | 0.02690 | 0.02780 |
| Co <sup>2+</sup> | 0.02388 | 0.02447 | 0.02520 | 0.02634 | 0.02717 | 0.02801 |
| Ni <sup>2+</sup> | 0.01402 | 0.01458 | 0.01542 | 0.01609 | 0.01658 | 0.01708 |
| Cu <sup>2+</sup> | 0.01073 | 0.01110 | 0.01162 | 0.01203 | 0.01239 | 0.01276 |

**Table S2 The relationship between relative spectral bandwidth (*RBW*) and absorbance measurement error ( $A_E$ ).**

| <i>RBW</i> | $A_E$  | <i>RBW</i> | $A_E$  | <i>RBW</i> | $A_E$  |
|------------|--------|------------|--------|------------|--------|
| 0.01       | 0.0005 | 0.06       | 0.0017 | 0.2        | 0.0181 |
| 0.02       | 0.0005 | 0.07       | 0.0023 | 0.3        | 0.0396 |
| 0.03       | 0.0005 | 0.08       | 0.003  | 0.4        | 0.0679 |
| 0.04       | 0.0008 | 0.09       | 0.0038 | 0.5        | 0.1013 |
| 0.05       | 0.0012 | 0.1        | 0.0046 |            |        |
